# Supplementary material for: Mid-infrared spectroscopy and machine learning for postconsumer plastics recycling
Source: Royal Society of Chemistry journal article supplement (doi:10.1039/d3va00111c), 2023-01-01
Supplement: d3va00111c1.pdf [file d3va00111c1.pdf]

# ELECTRONIC SUPPORTING INFORMATION

## *Mid-Infrared spectroscopy and machine learning for postconsumer plastics recycling*

Nicholas Stavinski,<sup>a</sup> Vaishali Maheshkar,<sup>b</sup> Sinai Thomas,<sup>a</sup> Karthik Dantu,<sup>\*b</sup> and Luis Velarde<sup>\*a</sup>

\* Corresponding Author

<sup>a</sup> Department of Chemistry, University at Buffalo, State University of New York, Buffalo, New York, 14260, United States.

<sup>b</sup> Department of Computer Science and Engineering, University at Buffalo, State University of New York, Buffalo, New York, 14260, United States.

# Table of Contents

## 1. Plastics Database

- i. Table S1: Sample totals and descriptions (color, transparency, shape)*

## 2. ATR-FTIR Spectra

- i. Figure S1a-e: Unprocessed MIR spectra*
- ii. Figure S2: Processed MIR spectra*

## 3. Machine Learning

### a. Autoencoders: Learning Curve (Fig. S3), RF, KNN, SVM, LR

- i. Table 1 and Figure 3: Unprocessed MIR spectra*
- ii. Table S1b and Figure S4: Processed MIR spectra*

### b. Principal Component Analysis

### c. Standard Classifiers (no autoencoders): RF, KNN, SVM, LR

- i. 1-Dimensional Convolutional Neural Network (1D-CNN)*
- ii. Table S1c and Figure S5: Unprocessed MIR spectra*
- iii. Table S1d and Figure S6: Processed MIR spectra*

## 4. HDPE and LDPE Classification

- i. Table S1e and Figure S7: Unprocessed MIR spectra*

## 5. Black Plastic Classification

- i. Figure S8: Unprocessed MIR spectra*
- ii. Figure S9: Unprocessed MIR spectra*

## 6. References

# Section 1. Plastics Database

**Table S1.** Database sample descriptions and totals. Overview of database plastics used in this study. Samples are organized by their resin code, appearance, and color. Images depict the color and transparency for each type of plastic object. \*\*Not all individual plastics samples are shown in Table S1. Only a representative image is shown for clarity. Full image library may be available upon request\*\*

| Plastic Type | Object | Color      | Total | Image                                                                                 |
|--------------|--------|------------|-------|---------------------------------------------------------------------------------------|
| HDPE         | Bottle | Black/dark | 2     | 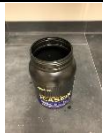   |
|              |        | Blue       | 1     | 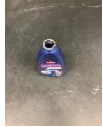  |
|              |        | Brown      | 2     | 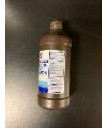 |
|              |        | Green      | 1     | 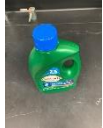 |
|              |        | Grey       | 1     | 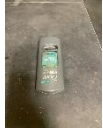 |
|              |        | Opaque     | 19    | 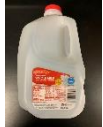 |
|              |        | Purple     | 1     | 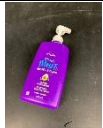 |
|              |        | Red        | 1     | 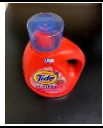 |

|  |                              |            |    |                                                                                       |  |
|--|------------------------------|------------|----|---------------------------------------------------------------------------------------|--|
|  |                              | White      | 51 | 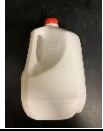   |  |
|  |                              | Yellow     | 3  | 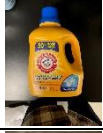   |  |
|  | Container/cup<br>/bowl/plate | Opaque     | 1  | 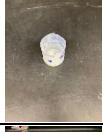   |  |
|  |                              | White      | 3  | 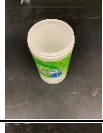   |  |
|  | Film/wrapping<br>/bag        | Clear      | 45 | 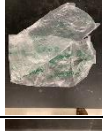   |  |
|  |                              | Opaque     | 6  | 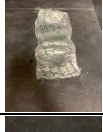  |  |
|  |                              | White      | 6  | 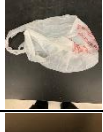 |  |
|  | Lid/cap                      | Black/dark | 1  | 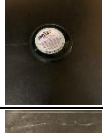 |  |
|  |                              | Blue       | 1  | 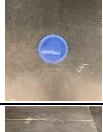 |  |
|  |                              | Clear      | 1  | 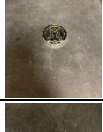 |  |
|  |                              | Opaque     | 2  | 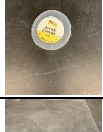 |  |
|  |                              | Orange     | 5  | 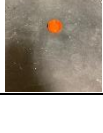 |  |

|      |                              |                   |     |                                                                                       |
|------|------------------------------|-------------------|-----|---------------------------------------------------------------------------------------|
|      |                              | White             | 14  | 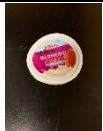   |
| LDPE | Bottle                       | Yellow            | 4   | 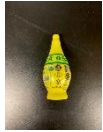   |
|      | Container/cup<br>/bowl/plate | Red               | 1   | 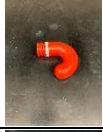   |
|      | Film/wrapping<br>/bag        | Brown             | 1   | 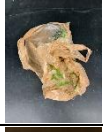   |
|      |                              | Clear             | 112 | 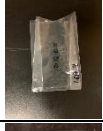   |
|      |                              | Green             | 2   | 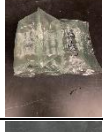  |
|      |                              | Greenish<br>blue  | 11  | 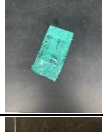 |
|      |                              | Opaque            | 2   | 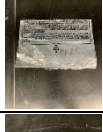 |
|      |                              | Reddish<br>orange | 1   | 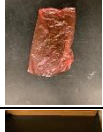 |
|      |                              | White             | 26  | 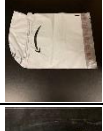 |
|      |                              | Yellow            | 1   | 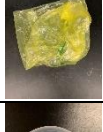 |
|      | Lid/cap                      | Clear             | 3   | 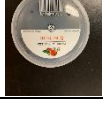 |

|     |                              |                           |    |                                                                                       |
|-----|------------------------------|---------------------------|----|---------------------------------------------------------------------------------------|
|     |                              | White                     | 1  | 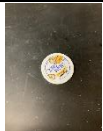   |
|     |                              | Yellow                    | 1  | 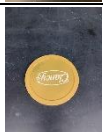   |
| PET | Bottle                       | Brown                     | 1  | 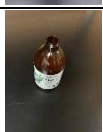   |
|     |                              | Clear                     | 61 | 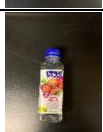   |
|     |                              | White                     | 1  | 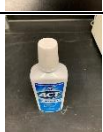   |
|     | Container/cup<br>/bowl/plate | Blue                      | 1  | 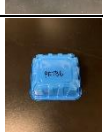   |
|     |                              | Clear                     | 72 | 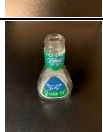  |
|     |                              | Hard<br>packaging<br>mold | 8  | 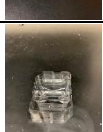 |
|     | Lid/cap                      | Clear                     | 23 | 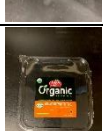 |
|     |                              |                           |    |                                                                                       |
| PP  | Bottle                       | Opaque                    | 1  | 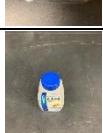 |
|     |                              | Orange                    | 3  | 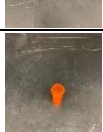 |
|     | Container/cup<br>/bowl/plate | Black/dark                | 23 | 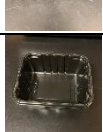 |

|    |                           |            |    |                                                                                       |
|----|---------------------------|------------|----|---------------------------------------------------------------------------------------|
|    |                           | Clear      | 29 | 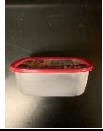   |
|    |                           | Opaque     | 17 | 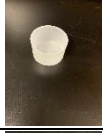   |
|    |                           | White      | 61 | 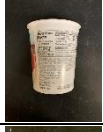   |
|    | Film/wrapping /bag        | Opaque     | 1  | 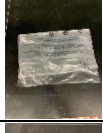   |
|    | Hard packaging mold       | Black/dark | 1  | 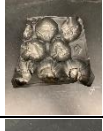   |
|    | Lid/cap                   | Blue       | 8  | 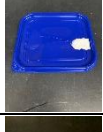  |
|    |                           | Clear      | 11 | 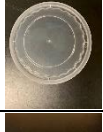 |
|    |                           | Green      | 2  | 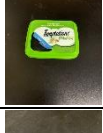 |
|    |                           | Opaque     | 2  | 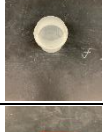 |
|    |                           | Red        | 3  | 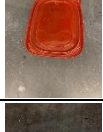 |
|    |                           | White      | 5  | 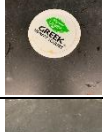 |
|    |                           |            |    |                                                                                       |
| PS | Container/cup /bowl/plate | Black/dark | 15 | 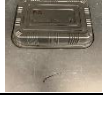 |

|  |                           |        |    |                                                                                       |  |
|--|---------------------------|--------|----|---------------------------------------------------------------------------------------|--|
|  |                           | Blue   | 2  | 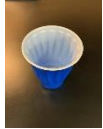   |  |
|  |                           | Brown  | 15 | 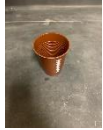   |  |
|  |                           | Clear  | 21 | 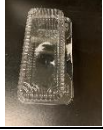   |  |
|  |                           | Green  | 15 | 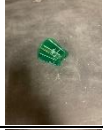   |  |
|  |                           | Opaque | 16 | 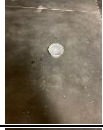   |  |
|  |                           | Pink   | 15 | 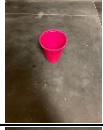   |  |
|  |                           | Red    | 10 | 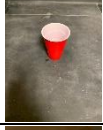 |  |
|  |                           | White  | 40 | 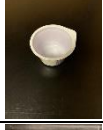 |  |
|  | Flat shape/eating utensil | Clear  | 3  | 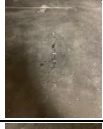 |  |
|  |                           | White  | 5  | 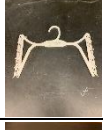 |  |
|  | Hard packaging mold       | Blue   | 1  | 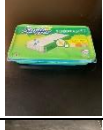 |  |
|  |                           | Orange | 1  | 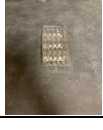 |  |

|  |         |            |   |                                                                                     |
|--|---------|------------|---|-------------------------------------------------------------------------------------|
|  | Lid/cap | Black/dark | 3 | 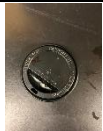 |
|  |         | Brown      | 4 | 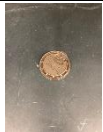 |
|  |         | Opaque     | 1 | 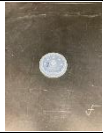 |

## Section 2. ATR-FTIR Spectra

**Figure S1a-e:** ATR-FTIR spectra corresponding to machine learning results in **Table 1** and **Figure 2**. These spectra are most reflective of the true chemical composition of mixed postconsumer plastic waste. No baseline corrections (accounting for CO<sub>2</sub> or H<sub>2</sub>O), normalizations, or other manipulations were performed.

**Figure S1a.** ATR-FTIR spectra of #1 PET postconsumer plastics (red) and a virgin polymer for reference (black). 501 spectra are shown.

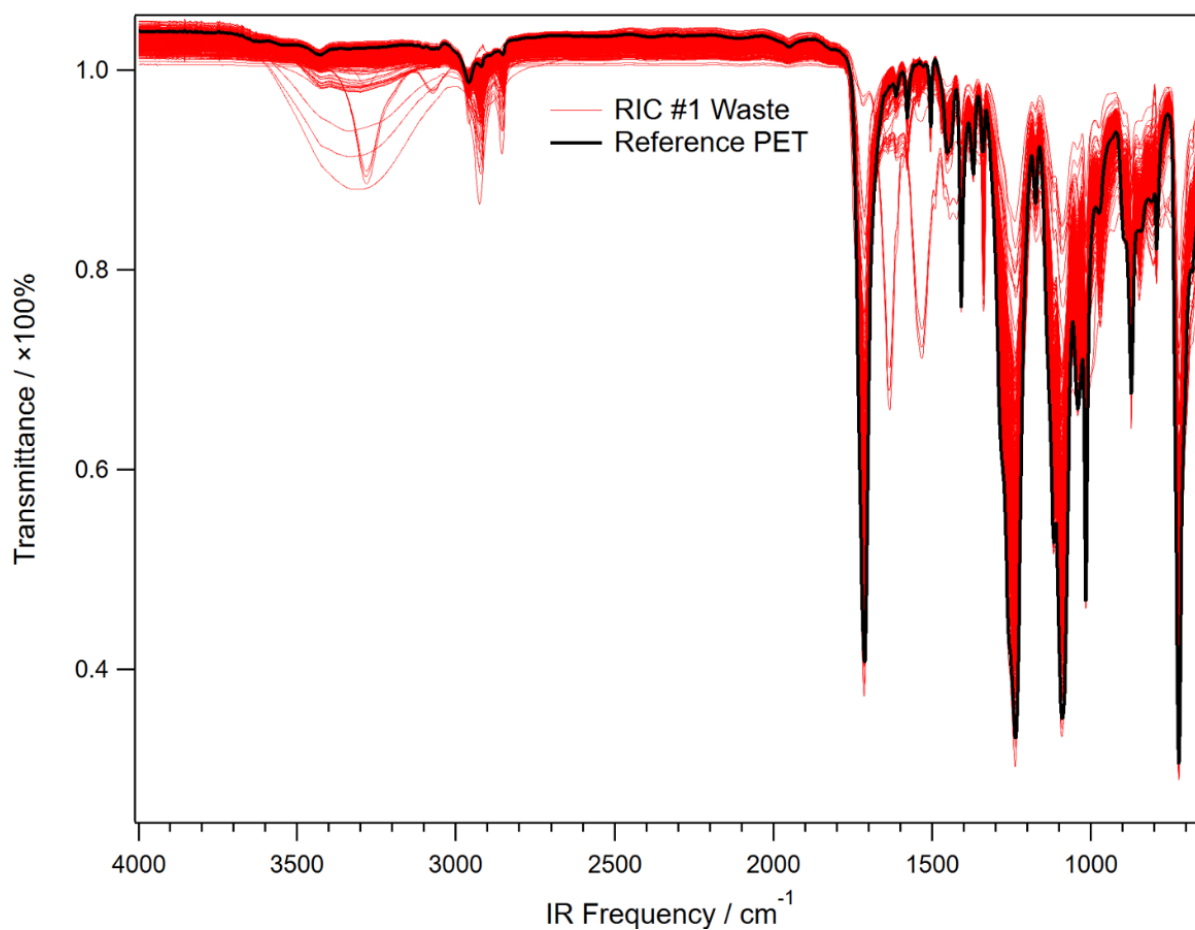

**Fig. S1b** ATR-FTIR spectra of #2 HDPE postconsumer plastics (red) and a virgin polymer for reference (black). 501 spectra are shown.

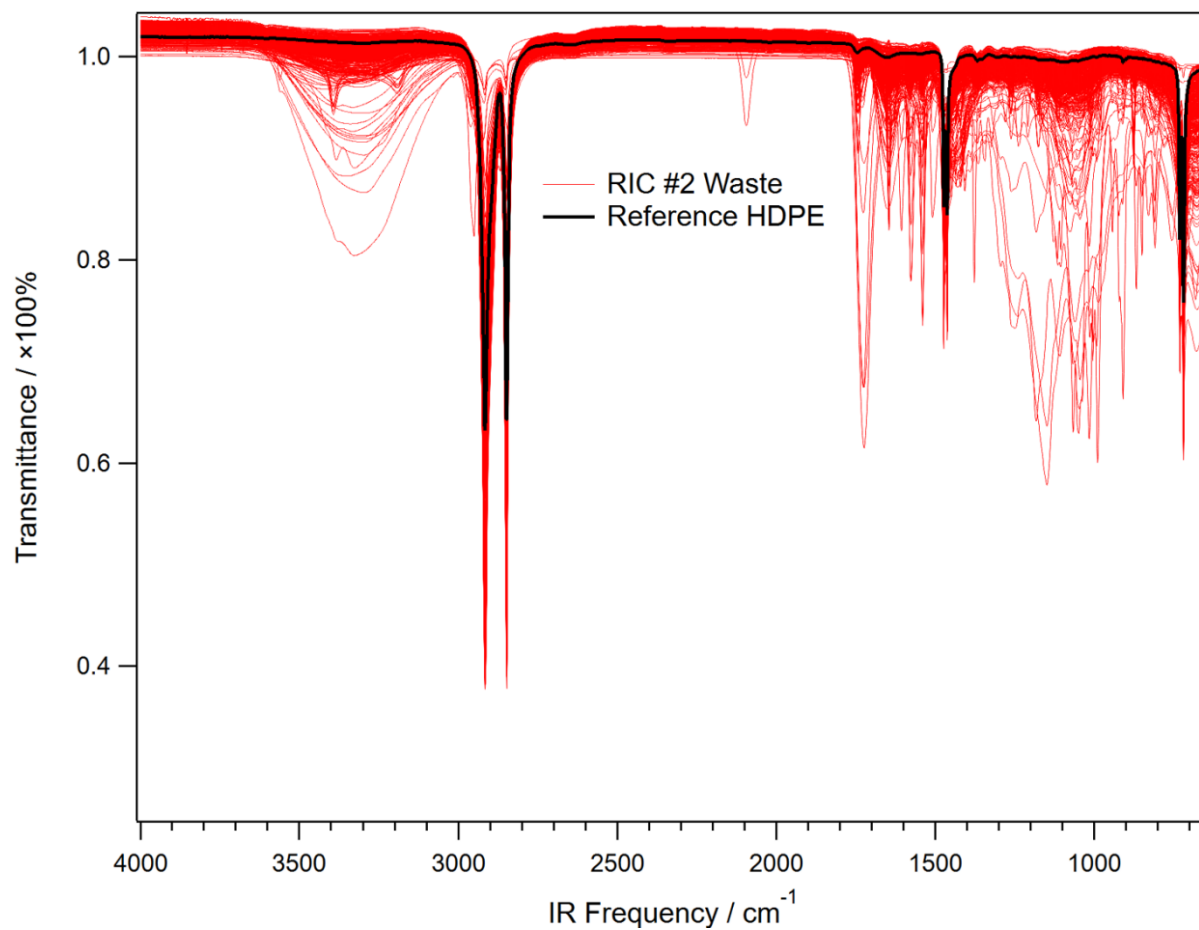

**Fig. S1c** ATR-FTIR spectra of #4 LDPE postconsumer plastics (red) and a virgin polymer for reference (black). 501 spectra are shown.

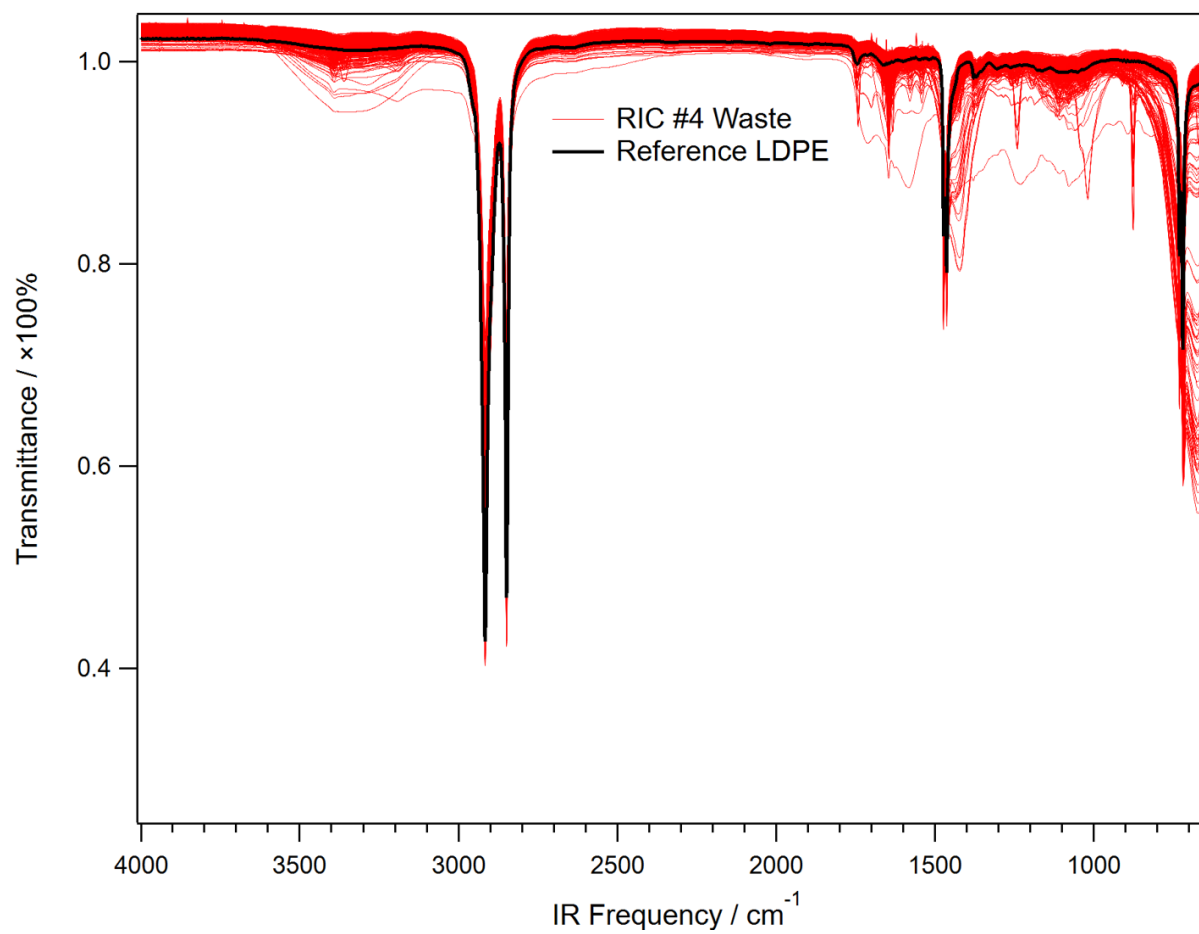

**Fig. S1d** ATR-FTIR spectra of #5 PP postconsumer plastics (red) and a virgin polymer for reference (black). 501 spectra are shown.

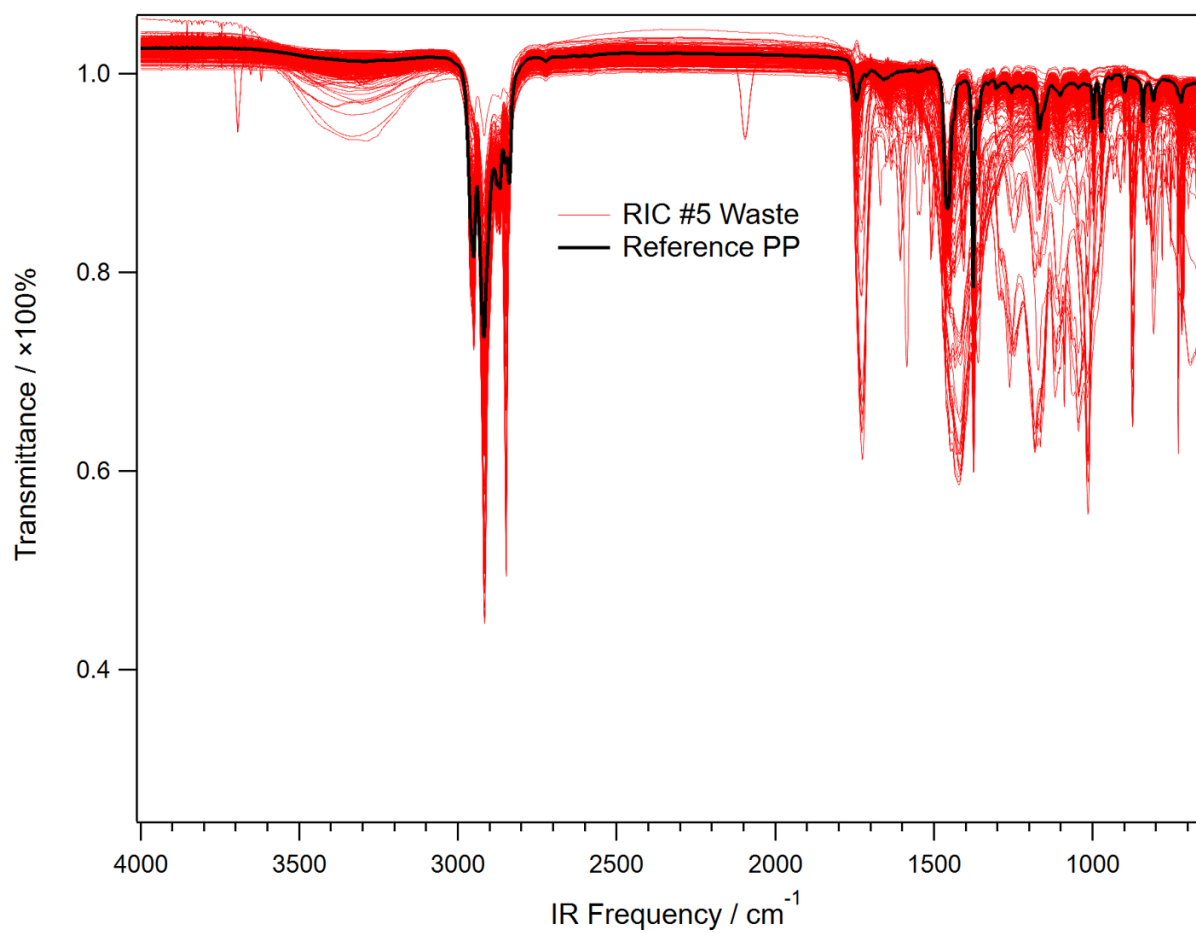

**Fig. S1e** ATR-FTIR spectra of #6 PS postconsumer plastics (red) and a virgin polymer for reference (black). 501 spectra are shown.

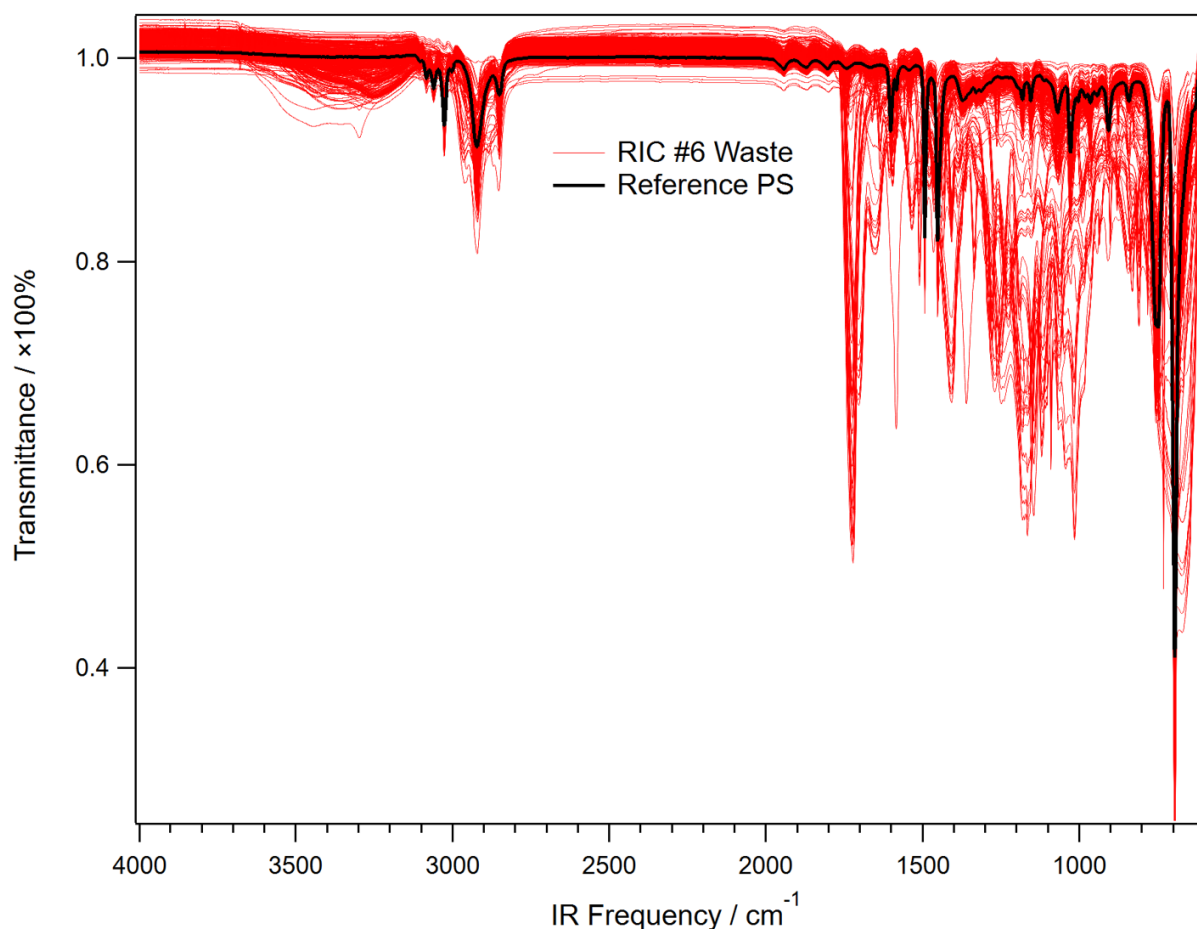

**Fig. S2** Processed spectra (Methods 2.2) of MIR database plastics. Plastic waste (red). Virgin reference polymer (black). The x-axis is split for observation of the regions-of-interest. Only 1/3<sup>rd</sup> of the database spectra are shown for clarity.

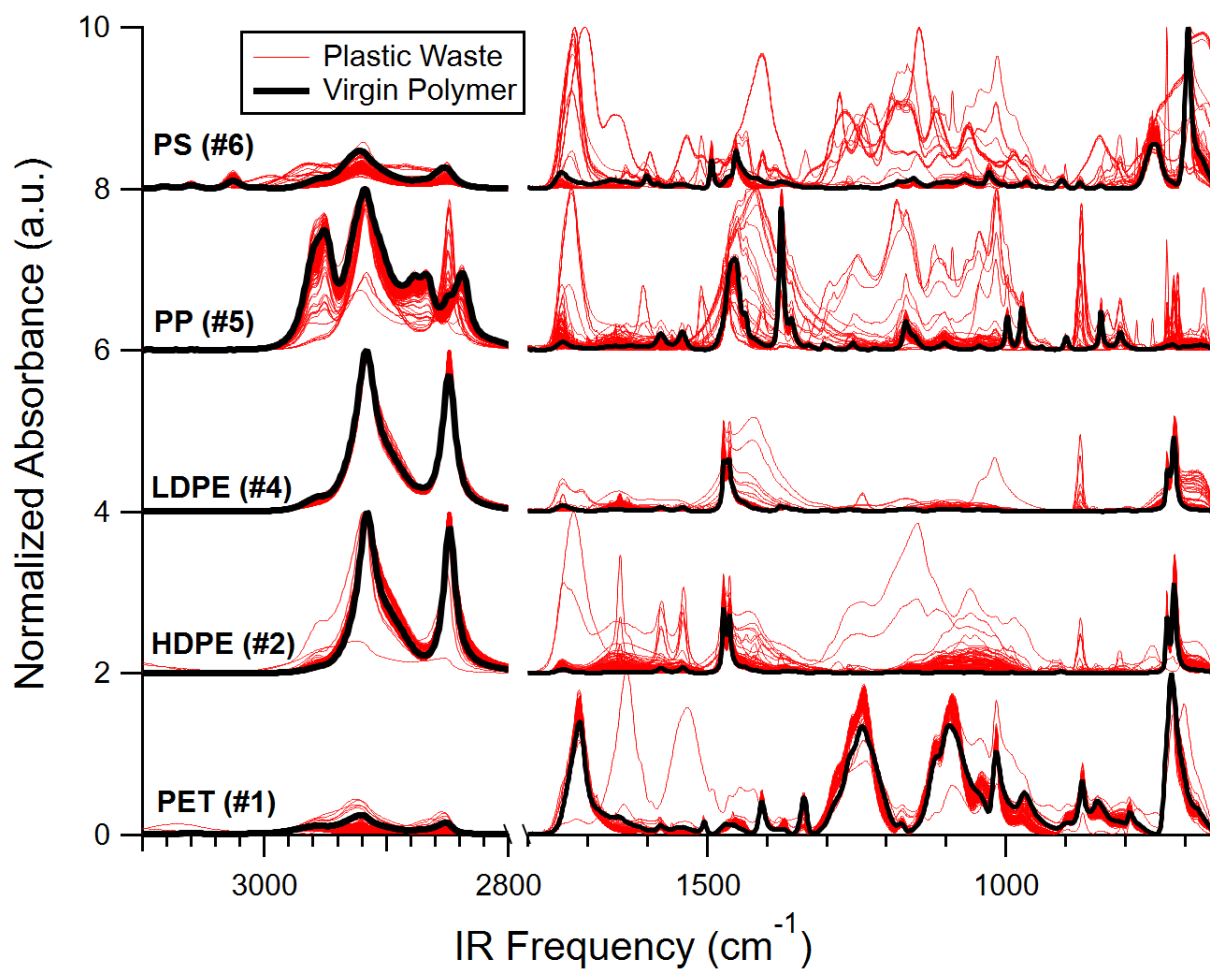

## Section 3. Machine Learning

### IMPORTANT DEFINITIONS:

“Unprocessed Spectra” = Spectra were acquired from 4000 to 650  $\text{cm}^{-1}$  as percent transmittance spectra without baseline correction (10 iterations, 64 baseline points, and excluded  $\text{CO}_2$  bands), normalization, or conversion to Absorbance. These acquisitions provide the most realistic glimpse of chemical heterogeneity within mixed postconsumer plastics because they include O-H and C-O mid-infrared bands corresponding to not only water and carbon dioxide, respectively, but also polymer additives.

“Processed Spectra” = Spectra were acquired from 4000 to 650  $\text{cm}^{-1}$  and processed using OPUS 7.5. Each spectrum contains 3474 data points, where each point represents the intensity in percent transmittance (Fig. 2) or absorbance units (Fig. 4) at a given wavenumber. The raw spectra were processed by converting from percent transmittance to absorbance, applying a concave rubberband baseline correction (10 iterations, 64 baseline points, and excluded  $\text{CO}_2$  bands), and performing a minimum/maximum normalization. These spectra are the “cleanest” in this study, but it should be understood that achieving results using this processing method would contribute additional mathematical steps in a real-world, practical mid-infrared sorting technology (e.g., adding additional time and computational load to the process).

### **3a. Autoencoders**

This study's dataset consists of 2,505 samples and each sample has 3,474 features. We have used the Multilayer Perceptron autoencoder model. We have used the Keras functional API for defining the model. The encoder is defined to have 2 hidden layers, the first layer has two times the number of inputs (6,948) and the second layer with the same number of inputs (3,474). The bottleneck layer has the same number of inputs (3,474). The decoder has a similar structure in reverse, it has 2 hidden layers, the first layer has the number of inputs in the dataset (3,474) and the second layer has double the inputs (6,948). The output layer will have the same number of output nodes as the input data which is 3,474. Linear activation is used to output numeric values. Batch normalization and leaky ReLU activation is used by the model for learning. Adam optimizer and mean squared error loss function are used.

**Fig. S3** Learning curve of autoencoder model applied to full MIR (4000-650  $\text{cm}^{-1}$ ) of all 5 plastic types. Y-axis is loss that approaches zero over increased epochs (x-axis). Model shows sufficient fit for reconstruction.

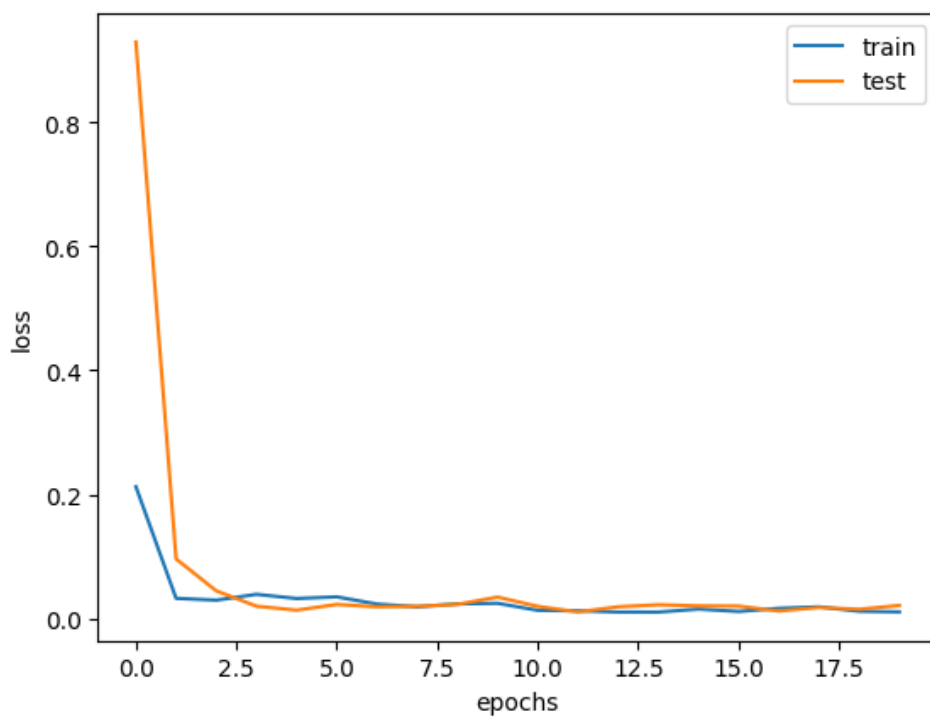

i. **ML Autoencoders Results using Unprocessed Spectra**

See manuscript **Table 1.** and **Fig. 3**

ii. **ML Autoencoders Results using Processed Spectra**

**Table S1b** Machine learning performance of spectra pre-processed using autoencoders (Fig. S2)

| Algorithm  | Full Mid-Infrared<br>(4000-650 $\text{cm}^{-1}$ ) |             | C-H Stretching<br>(2990-2820 $\text{cm}^{-1}$ ) |             | Fingerprint<br>(1500-650 $\text{cm}^{-1}$ ) |             |
|------------|---------------------------------------------------|-------------|-------------------------------------------------|-------------|---------------------------------------------|-------------|
|            | Accuracy (%)                                      | $\tau$ (ms) | Accuracy (%)                                    | $\tau$ (ms) | Accuracy (%)                                | $\tau$ (ms) |
| <b>RF</b>  | 100                                               | 125.807     | 100                                             | 70.001      | 100                                         | 53.144      |
| <b>KNN</b> | 98.842                                            | 3548.462    | 97.684                                          | 428.233     | 99.161                                      | 876.026     |
| <b>SVM</b> | 95.807                                            | 0.058       | 93.450                                          | 0.050       | 94.728                                      | 0.057       |
| <b>LR</b>  | 96.526                                            | 99.298      | 95.248                                          | 5.424       | 96.366                                      | 26.249      |

**Figure S4** Confusion matrices of ML models applied across five plastic types and the mid-infrared regions-of-interest. True and predicted label accuracies are highlighted in blue along the diagonal of each confusion matrix. Trained data were processed using the methods in 2.2 and 2.3 (Figure S2).

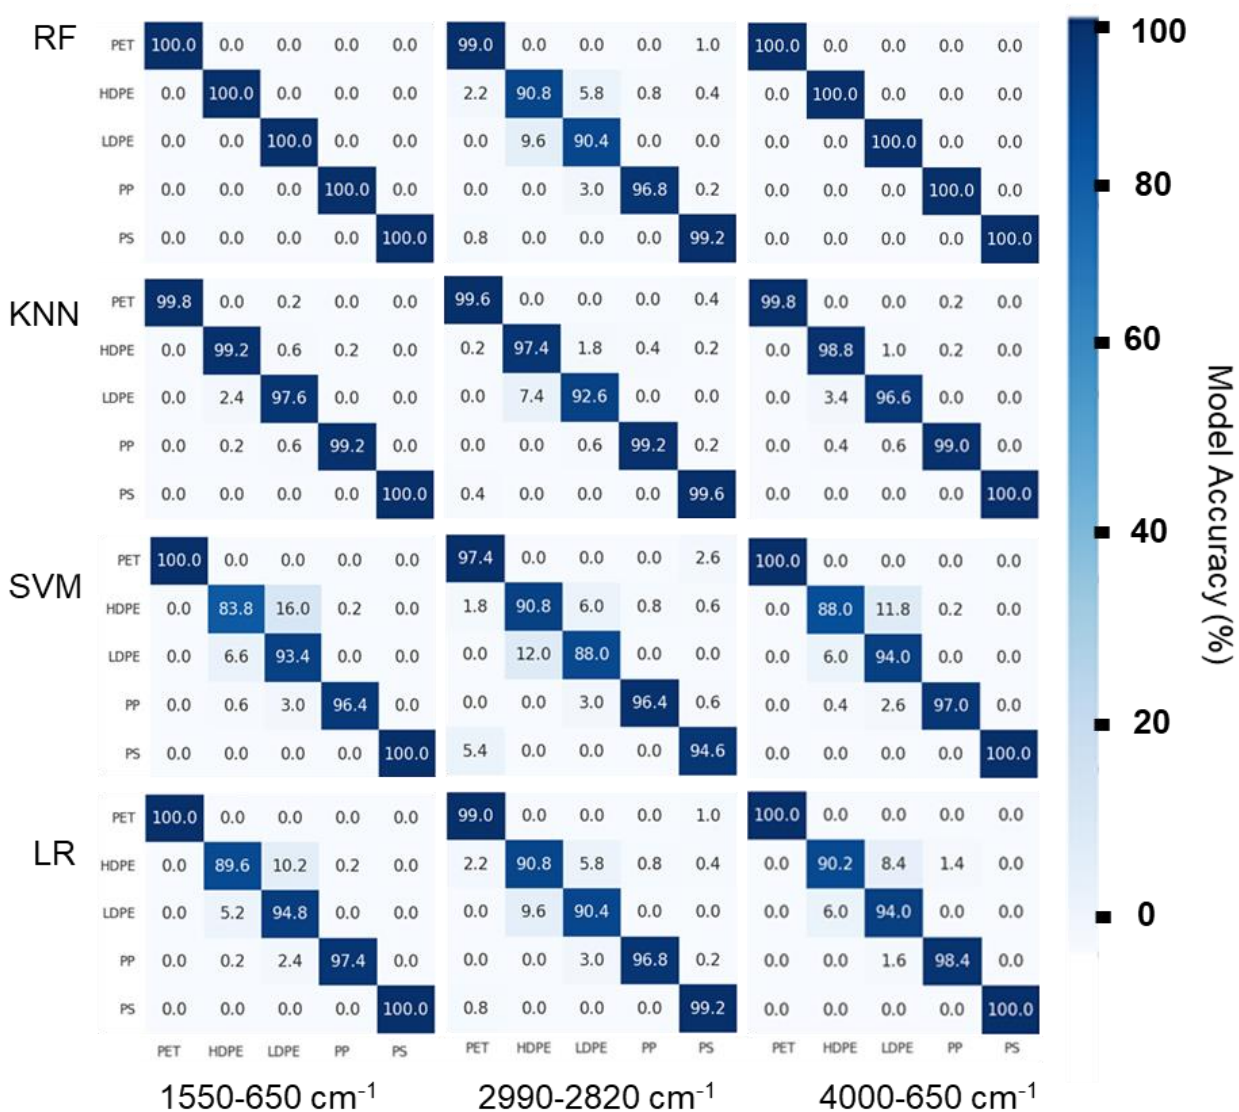

**3b. Principal Component Analysis (PCA)** was evaluated as a pre-processing technique on the spectral dataset and Random Forest algorithm was applied producing an accuracy of 98%.

### **3c. Standard Machine Learning Classifiers (without Autoencoders)**

#### **i. 1D-CNN Implementation to the MIR Plastics Database**

Convolutional neural networks (CNNs) are deep learning (DL) methods that have become of interest to the growing plastics recycling research community for their extensive learning architecture and ability to extract features from images for classification.<sup>1-3</sup> One-dimensional CNNs were applied to this study's database to assess the viability of DL techniques for plastic waste sorting. CNNs are traditionally used for high dimensional dataset such as images, whereas this dataset consists of 1-dimensional MIR spectra. Additionally, the performance of DL improves over increased dataset sizes. Relative to the size of conventional image datasets, the performance of DL was surpassed by the standard classifiers in this study (Table S5 and Figure S2). Future academic work should assess real-world plastics sorting systems using both standard classifiers and DL methods, as optimized sorting technologies that are later developed for industrial purposes may utilize a combination of automated ML schemes depending on the sample-of-interest and application.

Using a one-dimensional CNN (1D-CNN) architecture, spectral features were extracted for classification. The MIR spectra are 1-dimensional data files consisting of 3474 features and are converted to a 3474-element vector of features. The 1D-CNN architecture consists of 64 filters with kernel size of 3. These filters are convolved with the input vector to produce a scalar value which indicates the presence or absence of the pattern the filter is identifying. ReLu activation

function is a nonlinear function used to transform the summed weighted input from the node into the activation of the node or output for that input. Dropout of 0.5 is selected to drop the randomly selected neurons during training. Max pooling downsampled the input by calculating the maximum value for patches of feature maps thus reducing the dimensionality of the vector. To tune the performance of the model, the hyperparameters of the 1D-CNN architecture were applied according to the sklearn Application Programming Interface.

ii. ML Results using Unprocessed Spectra

**Table S1c** Machine learning performance of unprocessed spectra. Spectra corresponding to these results are found in Figure S1a-e.

|               | <b>4000 – 650 cm<sup>-1</sup></b> |               | <b>2990 – 2820 cm<sup>-1</sup></b> |               | <b>1500 – 650 cm<sup>-1</sup></b> |               |
|---------------|-----------------------------------|---------------|------------------------------------|---------------|-----------------------------------|---------------|
|               | <b>Accuracy (%)</b>               | <b>τ (ms)</b> | <b>Accuracy (%)</b>                | <b>τ (ms)</b> | <b>Accuracy (%)</b>               | <b>τ (ms)</b> |
| <b>RF</b>     | 90.615                            | 61.58         | 69.848                             | 67.23         | 79.673                            | 51.80         |
| <b>KNN</b>    | 82.907                            | 2137.97       | 83.546                             | 242.20        | 81.110                            | 795.92        |
| <b>SVM</b>    | 79.633                            | 1300          | 76.757                             | 282.71        | 96.006                            | 419.78        |
| <b>LR</b>     | 96.126                            | 141.27        | 89.297                             | 24.44         | 94.369                            | 29.29         |
| <b>1D-CNN</b> | 94.424                            | 12370.5       | 88.947                             | 4558.3        | 87.679                            | 5681.1        |

**Figure S5** Confusion matrices of ML models applied across five plastic types and the mid-infrared regions-of-interest. True and predicted label accuracies are highlighted in blue along the diagonal of each confusion matrix (Figure S1a-e).

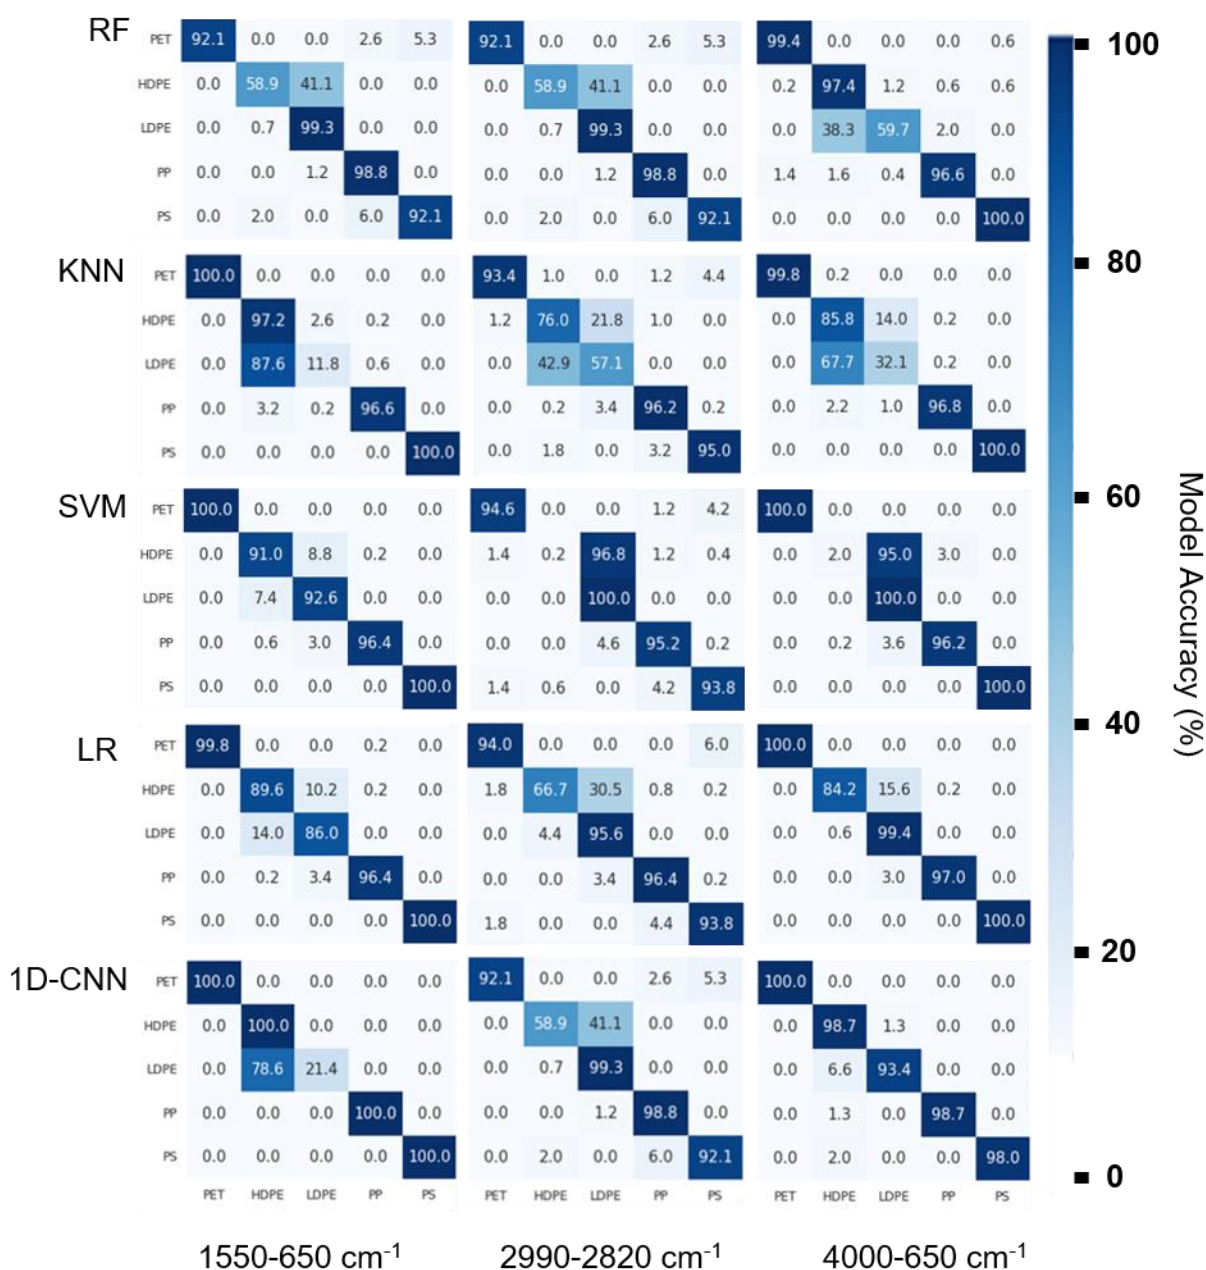

iii. ML Results using Processed Spectra

**Table S1d** Classification accuracies and prediction times for mid-infrared spectral regions.

Spectra were processed according to procedures specified in 2.2 and 2.3 (Figure S2).

|        | 4000 – 650 cm <sup>-1</sup> |             | 2990 – 2820 cm <sup>-1</sup> |             | 1500 – 650 cm <sup>-1</sup> |             |
|--------|-----------------------------|-------------|------------------------------|-------------|-----------------------------|-------------|
|        | Accuracy (%)                | $\tau$ (ms) | Accuracy (%)                 | $\tau$ (ms) | Accuracy (%)                | $\tau$ (ms) |
| RF     | 98.60                       | 17.33       | 97.41                        | 16.13       | 98.00                       | 17.40       |
| KNN    | 97.34                       | 25.97       | 96.01                        | 8.070       | 98.40                       | 11.61       |
| SVM    | 98.60                       | 1.470       | 94.01                        | 0.9400      | 96.41                       | 0.9200      |
| LR     | 97.00                       | 0.9600      | 93.01                        | 0.4400      | 95.41                       | 0.4600      |
| 1D-CNN | 96.90 (+/- 1.39)            | 6.000       | 91.73 (+/- 2.95)             | 2.000       | 92.08                       | 2.000       |

**Figure S6** Confusion matrices of ML models applied across five plastic types. True and predicted label accuracies are highlighted in blue along the diagonal of each confusion matrix.

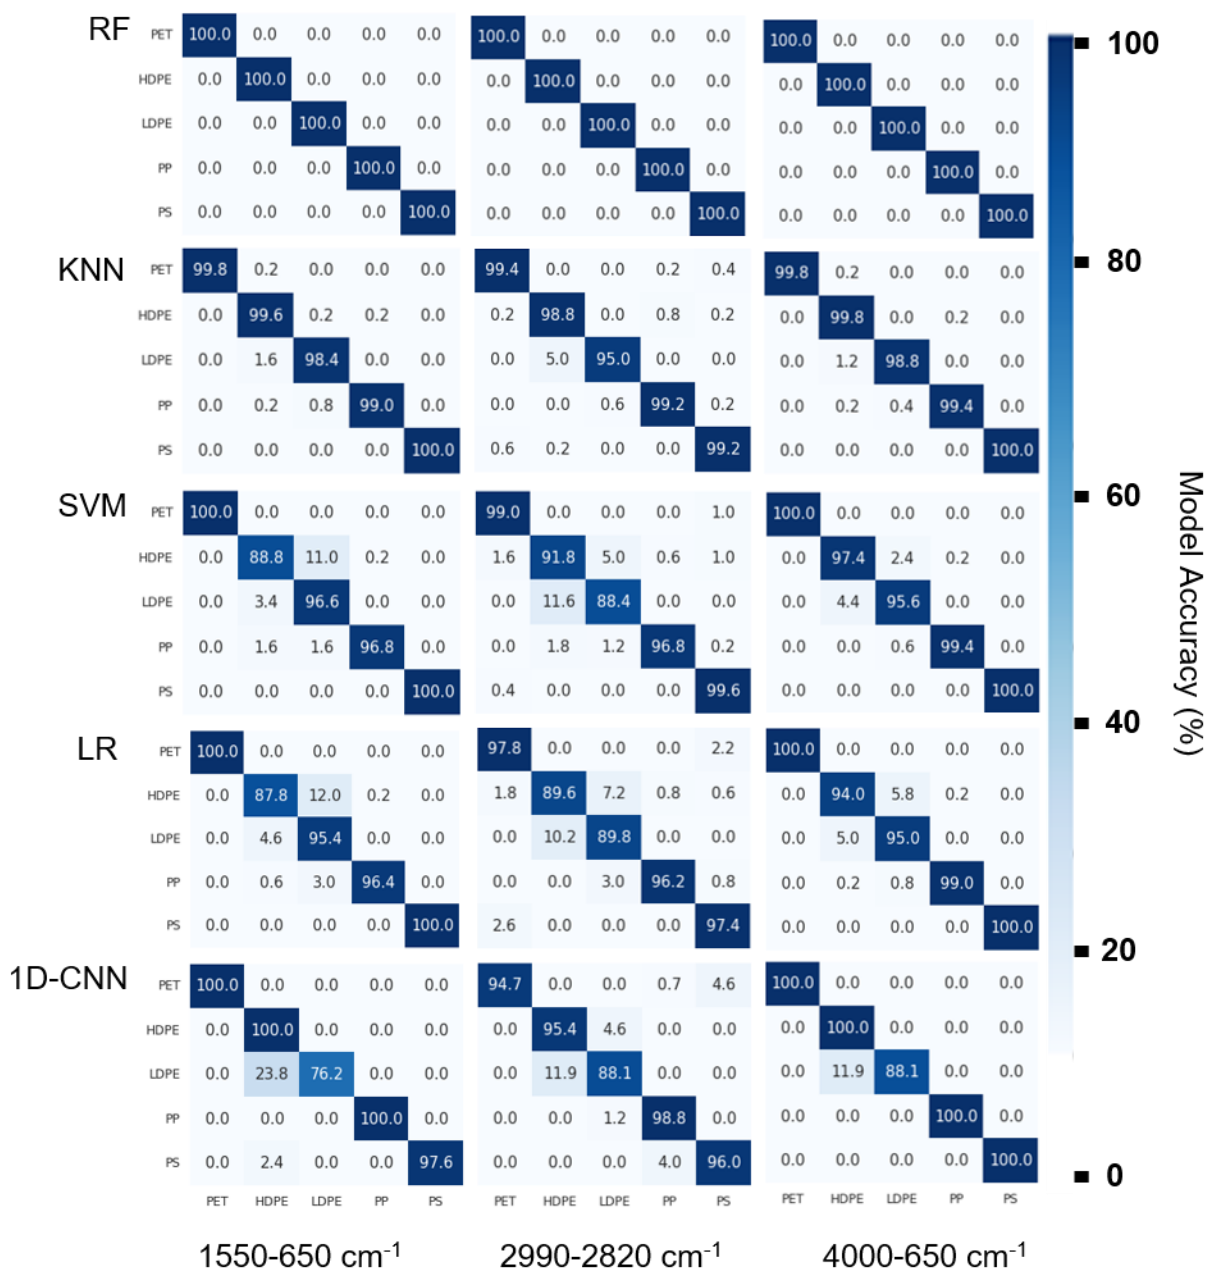

## Section 4. HDPE and LDPE Classification

i. *Table S1e and Figure S7: Unprocessed MIR spectra*

**Table S1e** Machine learning performance of unprocessed (percent transmittance, Fig. 3) HDPE and LDPE spectra using autoencoders.

| Algorithm  | Full Mid-Infrared<br>(4000-650 cm <sup>-1</sup> ) |         | C-H Stretching<br>(2990-2820 cm <sup>-1</sup> ) |         | Fingerprint<br>(1500-650 cm <sup>-1</sup> ) |         |
|------------|---------------------------------------------------|---------|-------------------------------------------------|---------|---------------------------------------------|---------|
|            | Accuracy (%)                                      | τ (ms)  | Accuracy (%)                                    | τ (ms)  | Accuracy (%)                                | τ (ms)  |
| <b>RF</b>  | 100                                               | 30.694  | 100                                             | 18.095  | 100                                         | 18.067  |
| <b>KNN</b> | 97.602                                            | 552.581 | 97.602                                          | 152.058 | 97.502                                      | 116.718 |
| <b>SVM</b> | 97.802                                            | 0.038   | 96.503                                          | 0.039   | 97.103                                      | 0.043   |
| <b>LR</b>  | 97.003                                            | 7.179   | 96.903                                          | 2.385   | 97.302                                      | 2.372   |

**Figure S7** Confusion matrices of ML models applied to HDPE and LDPE postconsumer plastics MIR spectra. True and predicted label accuracies are highlighted in blue along the diagonal of each confusion matrix.

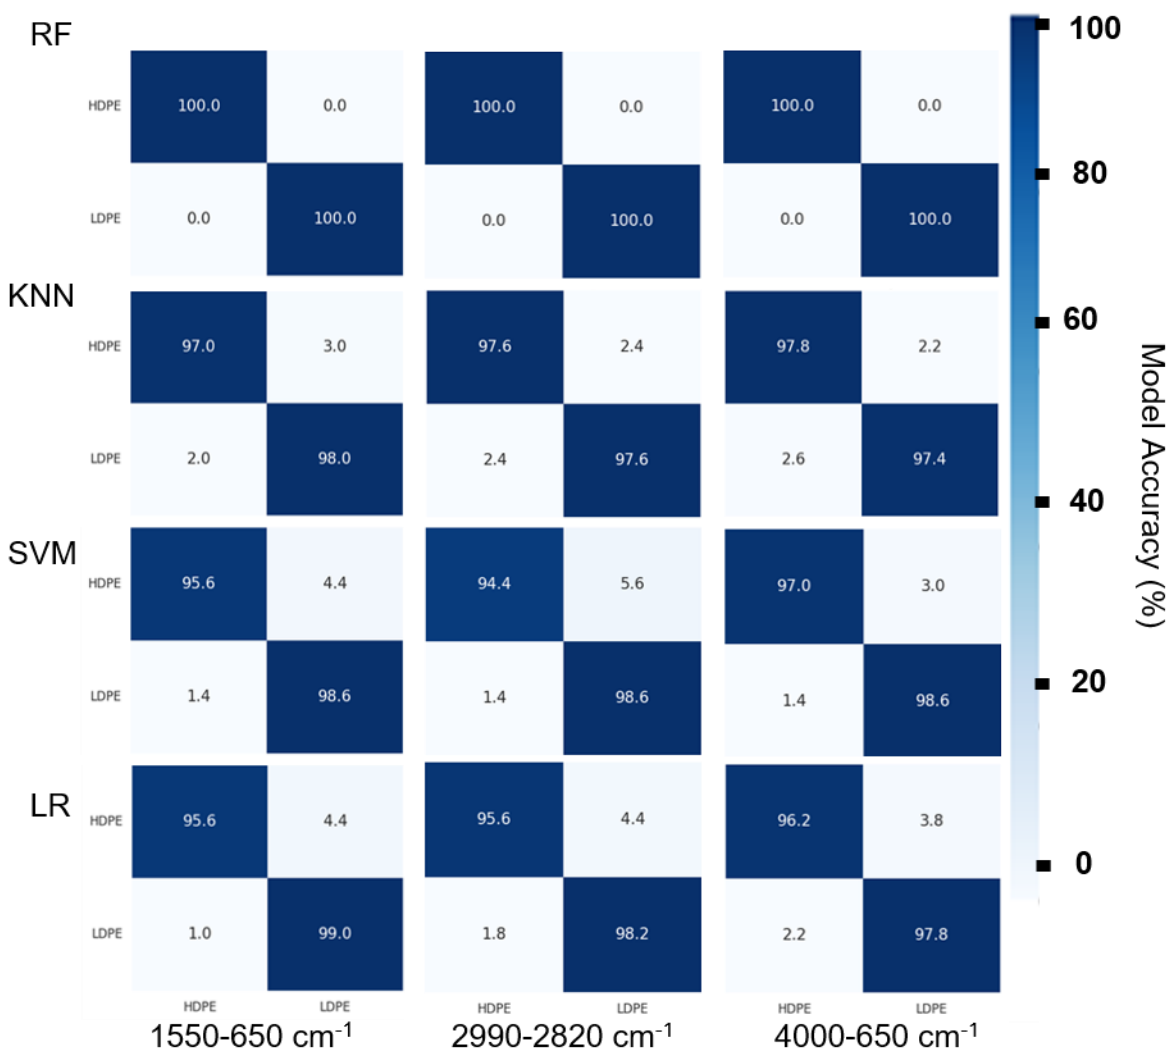

## Section 5. Black Plastics Classification

**Figure S8** Confusion matrix for black plastics. Accuracy is 100% using Random Forest without any pre-processing technique.

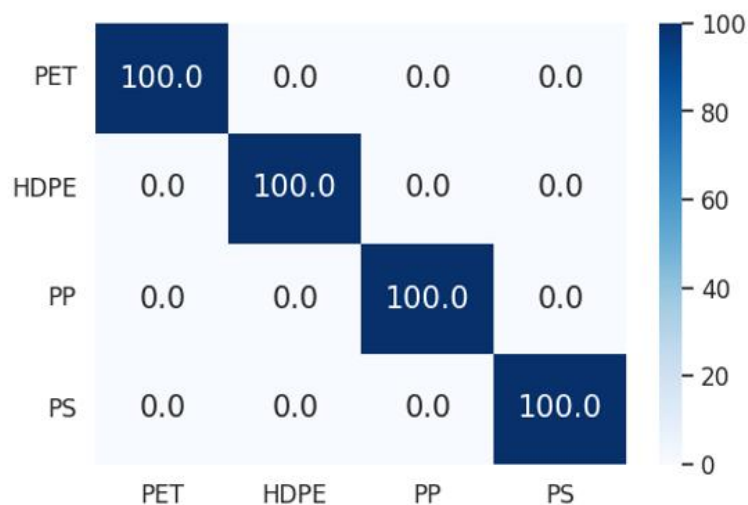

**Figure S9** Confusion matrix for black plastics. Accuracy is 99.779% using Random Forest without any pre-processing technique.

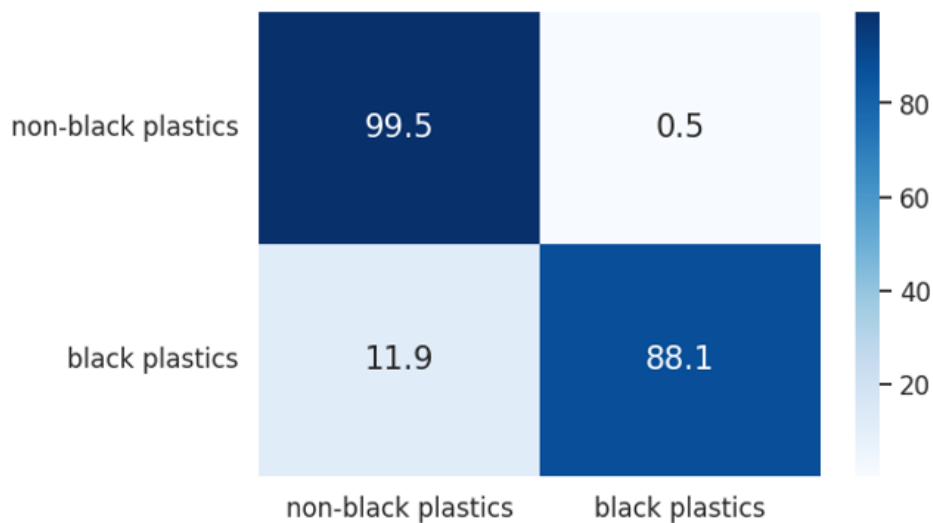

## Section 6. References

- (1) Zinchik, S.; Jiang, S.; Friis, S.; Long, F.; Høgsteds, L.; Zavala, V. M.; Bar-Ziv, E. Accurate Characterization of Mixed Plastic Waste Using Machine Learning and Fast Infrared Spectroscopy. *ACS Sustainable Chem. Eng.* **2021**, 9 (42), 14143–14151.  
<https://doi.org/10.1021/acssuschemeng.1c04281>.
- (2) Zhou, K.; Oh, S.-K.; Pedrycz, W.; Qiu, J.; Fu, Z.; Ryu, B.-G. Design of Data Feature-Driven 1D/2D Convolutional Neural Networks Classifier for Recycling Black Plastic Wastes through Laser Spectroscopy. *Advanced Engineering Informatics* **2022**, 53, 101695.  
<https://doi.org/10.1016/j.aei.2022.101695>.
- (3) Long, F.; Jiang, S.; Adekunle, A. G.; M Zavala, V.; Bar-Ziv, E. Online Characterization of Mixed Plastic Waste Using Machine Learning and Mid-Infrared Spectroscopy. *ACS Sustainable Chem. Eng.* **2022**, 10 (48), 16064–16069.  
<https://doi.org/10.1021/acssuschemeng.2c06052>.
- (4) Signoret, C.; Caro-Bretelle, A.-S.; Lopez-Cuesta, J.-M.; Ienny, P.; Perrin, D. Alterations of plastics spectra in MIR and the potential impacts on identification towards recycling. *Resources, Conservation and Recycling* **2020**, 161, 104980. DOI:  
<https://doi.org/10.1016/j.resconrec.2020.104980>.
